# Supplementary material for: MEIAT-CMAQ v1.0: A Modular Emission Inventory Allocation Tool for Community Multiscale Air Quality Model Version 1.0
Source: Copernicus journal article supplement (doi:10.5194/egusphere-2023-1309), 2023-08-08
Supplement: Supplementary file 1 [file egusphere-2023-1309-supplement.pdf]

# MEIAT-CMAQ v1.0: A Modular Emission Inventory Allocation Tool for Community Multiscale Air Quality Model Version 1.0

Haofan Wang<sup>1,2,3</sup>, Jiaxin Qiu<sup>4</sup>, Yiming Liu<sup>1,2,3,\*</sup>, Qi Fan<sup>1,2,3,\*</sup>, Xiao Lu<sup>1,2,3</sup>, Yang Zhang<sup>5</sup>, Kai Wu<sup>6</sup> Ao Shen<sup>1,2,3</sup>,

Yifei Xu<sup>1,2,3</sup>, Yinbao Jin<sup>1,2,3</sup>, Yuqi Zhu<sup>1,2,3</sup>, Jiayin Sun<sup>1,2,3</sup>, Haolin Wang<sup>1,2,3</sup>

<sup>1</sup>School of Atmospheric Sciences, Sun Yat-sen University, and Southern Marine Science and Engineering Guangdong Laboratory (Zhuhai), Zhuhai, 519082, PR China

<sup>2</sup>Guangdong Provincial Field Observation and Research Station for Climate Environment and Air Quality Change in the Pearl River Estuary, Guangzhou, 510275, PR China

<sup>3</sup>Guangdong Province Key Laboratory for Climate Change and Natural Disaster Studies, Sun Yat-sen University, Zhuhai, PR China

<sup>4</sup>College of New Energy and Environment, Jilin University, Changchun 130012, China

<sup>5</sup>College of Resources and Environment, Chengdu University of Information Technology, Chengdu, 610225, China

<sup>6</sup>Department of Civil and Environmental Engineering, University of California, Irvine, CA 92697, USA

Correspondence to: Yiming Liu ([liuym88@mail.sysu.edu.cn](mailto:liuym88@mail.sysu.edu.cn)), Qi Fan ([cesfq@mail.sysu.edu.cn](mailto:cesfq@mail.sysu.edu.cn))

## 1. Table

Table S1 the species profile of agricultural sector.

| Pollutant | Model Variable | Split factor | Molecular Weight | Pollutant | Model Variable | Split factor | Molecular Weight |
|-----------|----------------|--------------|------------------|-----------|----------------|--------------|------------------|
| CB05_ALD2 | ALD2           | 1            | 44.03499         | PM25      | PMG            | 1            | \                |
| CB05_ALDX | ALDX           | 1            | 39.22808         | PM25      | PMN            | 1            | \                |
| CB05_ETH  | ETH            | 1            | 28.05300         | PM25      | PMOTHR         | 1            | \                |
| CB05_ETOH | ETOH           | 1            | 30.06900         | PM25      | PNA            | 1            | \                |
| CB05_FORM | FORM           | 1            | 45.84470         | PM25      | PNCOM          | 1            | \                |
| CB05_IOLE | IOLE           | 1            | 30.02600         | PM25      | PNH4           | \            | \                |
| CB05_ISOP | ISOP           | 1            | 57.09965         | PM25      | PNO3           | \            | \                |
| CB05_MEOH | MEOH           | 1            | 68.11700         | PM25      | PSI            | \            | \                |
| CB05_OLE  | OLE            | 1            | 32.04200         | PM25      | PSO4           | \            | \                |
| CB05_PAR  | PAR            | 1            | 0.992943         | PM25      | PTI            | \            | \                |
| CB05_TERP | TERP           | 1            | 29.63422         | SO2       | SO2            | 0            | 64               |
| CB05_TOL  | TOL            | 1            | 15.11587         | SO2       | SULF           | 0            | 98               |
| CB05_UNR  | UNR            | 1            | 136.2352         | NH3       | NH3            | 1            | 17               |
| CB05_XYL  | XYL            | 1            | 96.79334         | CO        | CO             | 0            | 28               |
| PM25      | PAL            | \            | \                | PMC       | PMC            | \            | \                |
| PM25      | PCA            | \            | \                | NOx       | NO             | 0            | 30               |
| PM25      | PCL            | \            | \                | NOx       | NO2            | 0            | 46               |
| PM25      | PFE            | \            | \                | NOx       | HONO           | 0            | 47               |
| PM25      | PH2O           | \            | \                | OC        | POC            | \            | \                |
| PM25      | PK             | \            | \                |           |                |              |                  |

Table S2 the species profile of industry sector.

| Pollutant | Model Variable | Split factor | Molecular Weight | Pollutant | Model Variable | Split factor | Molecular Weight |
|-----------|----------------|--------------|------------------|-----------|----------------|--------------|------------------|
| CB05_ALD2 | ALD2           | 1            | 44.03499         | PM25      | PMG            | 0.0014880    | \                |
| CB05_ALDX | ALDX           | 1            | 39.22808         | PM25      | PMN            | 0.0013680    | \                |
| CB05_ETH  | ETH            | 1            | 28.05300         | PM25      | PMOTHR         | 0.5697050    | \                |
| CB05_ETOH | ETOH           | 1            | 30.06900         | PM25      | PNA            | 0.0104500    | \                |
| CB05_FORM | FORM           | 1            | 45.84470         | PM25      | PNCOM          | 0.0789120    | \                |
| CB05_IOLE | IOLE           | 1            | 30.02600         | PM25      | PNH4           | 0.0018190    | \                |
| CB05_ISOP | ISOP           | 1            | 57.09965         | PM25      | PNO3           | 0.0044440    | \                |
| CB05_MEOH | MEOH           | 1            | 68.11700         | PM25      | PSI            | 0.0891350    | \                |
| CB05_OLE  | OLE            | 1            | 32.04200         | PM25      | PSO4           | 0.0969410    | \                |
| CB05_PAR  | PAR            | 1            | 0.992943         | PM25      | PTI            | 0.0041100    | \                |
| CB05_TERP | TERP           | 1            | 29.63422         | SO2       | SO2            | 1            | 64               |
| CB05_TOL  | TOL            | 1            | 15.11587         | SO2       | SULF           | 0.0091900    | 98               |
| CB05_UNR  | UNR            | 1            | 136.2352         | NH3       | NH3            | 1            | 17               |
| CB05_XYL  | XYL            | 1            | 96.79334         | CO        | CO             | 1            | 28               |
| PM25      | PAL            | 0.0308380    | \                | PMC       | PMC            | 1            | \                |
| PM25      | PCA            | 0.0469200    | \                | NOx       | NO             | 0.9000000    | 30               |
| PM25      | PCL            | 0.0056230    | \                | NOx       | NO2            | 0.0920000    | 46               |
| PM25      | PFE            | 0.0298310    | \                | NOx       | HONO           | 0.0080000    | 47               |
| PM25      | PH2O           | 0.0077820    | \                | OC        | POC            | 1            | \                |
| PM25      | PK             | 0.0206350    | \                |           |                |              |                  |

Table S3 the species profile of power sector.

| Pollutant | Model Variable | Split factor | Molecular Weight | Pollutant | Model Variable | Split factor | Molecular Weight |
|-----------|----------------|--------------|------------------|-----------|----------------|--------------|------------------|
| CB05_ALD2 | ALD2           | 1            | 44.03499         | PM25      | PMG            | 0.000459     | 1                |
| CB05_ALDX | ALDX           | 1            | 39.22808         | PM25      | PMN            | 0.000248     | 1                |
| CB05_ETH  | ETH            | 1            | 28.05300         | PM25      | PMOTHR         | 0.588929     | 1                |
| CB05_ETOH | ETOH           | 1            | 30.06900         | PM25      | PNA            | 0.0001160    | 1                |
| CB05_FORM | FORM           | 1            | 45.84470         | PM25      | PNCOM          | 0.0439030    | \                |
| CB05_IOLE | IOLE           | 1            | 30.02600         | PM25      | PNH4           | 0.0036990    | \                |
| CB05_ISOP | ISOP           | 1            | 57.09965         | PM25      | PNO3           | 0.0062010    | \                |
| CB05_MEOH | MEOH           | 1            | 68.11700         | PM25      | PSI            | 0.0774440    | \                |
| CB05_OLE  | OLE            | 1            | 32.04200         | PM25      | PSO4           | 0.1591220    | \                |
| CB05_PAR  | PAR            | 1            | 0.992943         | PM25      | PTI            | 0.0038770    | \                |
| CB05_TERP | TERP           | 1            | 29.63422         | SO2       | SO2            | 1            | 64               |
| CB05_TOL  | TOL            | 1            | 15.11587         | SO2       | SULF           | 0.0218000    | 98               |
| CB05_UNR  | UNR            | 1            | 136.2352         | NH3       | NH3            | 1            | 17               |
| CB05_XYL  | XYL            | 1            | 96.79334         | CO        | CO             | 1            | 28               |
| PM25      | PAL            | 0.0502350    | \                | PMC       | PMC            | 1            | \                |
| PM25      | PCA            | 0.0346280    | \                | NOx       | NO             | 0.9000000    | 30               |
| PM25      | PCL            | 0.0011520    | \                | NOx       | NO2            | 0.0920000    | 46               |
| PM25      | PFE            | 0.0251040    | \                | NOx       | HONO           | 0.0080000    | 47               |
| PM25      | PH2O           | 0.0000395    | \                | OC        | POC            | 1            | \                |
| PM25      | PK             | 0.0048440    | \                |           |                |              |                  |

Table S4 the species profile of residential sector.

| Pollutant | Model Variable | Split factor | Molecular Weight | Pollutant | Model Variable | Split factor | Molecular Weight |
|-----------|----------------|--------------|------------------|-----------|----------------|--------------|------------------|
| CB05_ALD2 | ALD2           | 1            | 44.03499         | PM25      | PMG            | 0.0004890    | \                |
| CB05_ALDX | ALDX           | 1            | 39.22808         | PM25      | PMN            | 0.0000248    | \                |
| CB05_ETH  | ETH            | 1            | 28.05300         | PM25      | PMOTHR         | 0.0753850    | \                |
| CB05_ETOH | ETOH           | 1            | 30.06900         | PM25      | PNA            | 0.0055600    | \                |
| CB05_FORM | FORM           | 1            | 45.84470         | PM25      | PNCOM          | 0.7932240    | \                |
| CB05_IOLE | IOLE           | 1            | 30.02600         | PM25      | PNH4           | 0.0067730    | \                |
| CB05_ISOP | ISOP           | 1            | 57.09965         | PM25      | PNO3           | 0.0062230    | \                |
| CB05_MEOH | MEOH           | 1            | 68.11700         | PM25      | PSI            | 0.0150330    | \                |
| CB05_OLE  | OLE            | 1            | 32.04200         | PM25      | PSO4           | 0.0276620    | \                |
| CB05_PAR  | PAR            | 1            | 0.992943         | PM25      | PTI            | 0.0001030    | \                |
| CB05_TERP | TERP           | 1            | 29.63422         | SO2       | SO2            | 1            | 64               |
| CB05_TOL  | TOL            | 1            | 15.11587         | SO2       | SULF           | 0.0148000    | 98               |
| CB05_UNR  | UNR            | 1            | 136.2352         | NH3       | NH3            | 1            | 17               |
| CB05_XYL  | XYL            | 1            | 96.79334         | CO        | CO             | 1            | 28               |
| PM25      | PAL            | 0.0009060    | \                | PMC       | PMC            | 1            | \                |
| PM25      | PCA            | 0.0034300    | \                | NOx       | NO             | 0.9000000    | 30               |
| PM25      | PCL            | 0.0267580    | \                | NOx       | NO2            | 0.0920000    | 46               |
| PM25      | PFE            | 0.0006750    | \                | NOx       | HONO           | 0.0080000    | 47               |
| PM25      | PH2O           | 0.0000286    | \                | OC        | POC            | 1            | \                |
| PM25      | PK             | 0.0377230    | \                |           |                |              |                  |

Table S5 the species profile of transportation sector.

| Pollutant | Model Variable | Split factor | Molecular Weight | Pollutant | Model Variable | Split factor | Molecular Weight |
|-----------|----------------|--------------|------------------|-----------|----------------|--------------|------------------|
| CB05_ALD2 | ALD2           | 1            | 44.03499         | PM25      | PMG            | 0.040729     | 1                |
| CB05_ALDX | ALDX           | 1            | 39.22808         | PM25      | PMN            | 0.0005000    | 1                |
| CB05_ETH  | ETH            | 1            | 28.05300         | PM25      | PMOTHR         | 0.2643680    | 1                |
| CB05_ETOH | ETOH           | 1            | 30.06900         | PM25      | PNA            | 0.0029860    | \                |
| CB05_FORM | FORM           | 1            | 45.84470         | PM25      | PNCOM          | 0.3751070    | \                |
| CB05_IOLE | IOLE           | 1            | 30.02600         | PM25      | PNH4           | 0.0413690    | \                |
| CB05_ISOP | ISOP           | 1            | 57.09965         | PM25      | PNO3           | 0.0167030    | \                |
| CB05_MEOH | MEOH           | 1            | 68.11700         | PM25      | PSI            | 0.0436760    | \                |
| CB05_OLE  | OLE            | 1            | 32.04200         | PM25      | PSO4           | 0.0963100    | \                |
| CB05_PAR  | PAR            | 1            | 0.992943         | PM25      | PTI            | 0.0019670    | \                |
| CB05_TERP | TERP           | 1            | 29.63422         | SO2       | SO2            | 1            | 64               |
| CB05_TOL  | TOL            | 1            | 15.11587         | SO2       | SULF           | 0            | 98               |
| CB05_UNR  | UNR            | 1            | 136.2352         | NH3       | NH3            | 1            | 17               |
| CB05_XYL  | XYL            | 1            | 96.79334         | CO        | CO             | 1            | 28               |
| PM25      | PAL            | 0.0056020    | \                | PMC       | PMC            | 1            | /                |
| PM25      | PCA            | 0.0333030    | \                | NOx       | NO             | 0.9000000    | 30               |
| PM25      | PCL            | 0.0091790    | \                | NOx       | NO2            | 0.0920000    | 46               |
| PM25      | PFE            | 0.0622200    | \                | NOx       | HONO           | 0.0080000    | 47               |
| PM25      | PH2O           | 0.0037060    | \                | OC        | POC            | 1            | /                |
| PM25      | PK             | 0.0022760    | \                |           |                |              |                  |

Table S6 The weekly profile of each sector, with 0 representing Sunday and 1-6 representing Monday to Saturday, respectively.

| weekly | Power (POW) | Industry (IND) | Residential (RES) | Transportation (TRA) | Agriculture (AGR) |
|--------|-------------|----------------|-------------------|----------------------|-------------------|
| 0      | 0.130       | 0.078          | 0.143             | 0.108                | 0.143             |
| 1      | 0.147       | 0.162          | 0.143             | 0.155                | 0.143             |
| 2      | 0.147       | 0.162          | 0.143             | 0.155                | 0.143             |
| 3      | 0.147       | 0.162          | 0.143             | 0.155                | 0.143             |
| 4      | 0.147       | 0.162          | 0.143             | 0.155                | 0.143             |
| 5      | 0.147       | 0.162          | 0.143             | 0.155                | 0.143             |
| 6      | 0.135       | 0.112          | 0.143             | 0.117                | 0.143             |

Table S7 The hourly profile of each sector.

| Hour (UTC) | POW   | IND   | RES   | TRA   | AGR   | Hour (UTC) | POW   | IND   | RES   | TRA   | AGR   |
|------------|-------|-------|-------|-------|-------|------------|-------|-------|-------|-------|-------|
| 0          | 0.032 | 0.026 | 0.038 | 0.017 | 0.026 | 12         | 0.050 | 0.068 | 0.045 | 0.050 | 0.089 |
| 1          | 0.030 | 0.007 | 0.038 | 0.013 | 0.019 | 13         | 0.050 | 0.068 | 0.038 | 0.059 | 0.082 |
| 2          | 0.029 | 0.007 | 0.030 | 0.014 | 0.019 | 14         | 0.050 | 0.068 | 0.030 | 0.060 | 0.080 |
| 3          | 0.028 | 0.007 | 0.045 | 0.015 | 0.018 | 15         | 0.050 | 0.068 | 0.030 | 0.062 | 0.070 |
| 4          | 0.029 | 0.007 | 0.045 | 0.016 | 0.019 | 16         | 0.050 | 0.068 | 0.038 | 0.059 | 0.060 |
| 5          | 0.032 | 0.007 | 0.038 | 0.016 | 0.021 | 17         | 0.049 | 0.066 | 0.075 | 0.057 | 0.045 |
| 6          | 0.035 | 0.007 | 0.030 | 0.029 | 0.029 | 18         | 0.048 | 0.063 | 0.075 | 0.056 | 0.031 |
| 7          | 0.040 | 0.029 | 0.030 | 0.056 | 0.033 | 19         | 0.047 | 0.037 | 0.075 | 0.049 | 0.027 |
| 8          | 0.043 | 0.045 | 0.038 | 0.060 | 0.047 | 20         | 0.047 | 0.037 | 0.075 | 0.045 | 0.023 |
| 9          | 0.046 | 0.068 | 0.038 | 0.059 | 0.058 | 21         | 0.044 | 0.037 | 0.054 | 0.042 | 0.021 |
| 10         | 0.048 | 0.068 | 0.030 | 0.059 | 0.070 | 22         | 0.040 | 0.037 | 0.018 | 0.031 | 0.021 |
| 11         | 0.050 | 0.068 | 0.045 | 0.050 | 0.089 | 23         | 0.035 | 0.037 | 0.018 | 0.022 | 0.021 |

Table S8 The vertical profile of each sector.

|                    |       |    |      |    |      |     |
|--------------------|-------|----|------|----|------|-----|
| Pressure (pa)      | 1.000 | 0  | 0    | 0  | 0    | 0   |
| Industry (%)       | 6     | 16 | 75   | 3  | 0    | 0   |
| Power (%)          | 0     | 0  | 0.25 | 51 | 45.3 | 0.2 |
| Agriculture (%)    | 100   | 0  | 0    | 0  | 0    | 0   |
| Transportation (%) | 100   | 0  | 0    | 0  | 0    | 0   |
| Residential (%)    | 100   | 0  | 0    | 0  | 0    | 0   |

Table S9 Meteorological verification metrics for 2-m relative humidity in January.

| Site  | N   | Ave.  |       | R    | MB     | ME    | MFB     | MFE    | NMB     | NME    |
|-------|-----|-------|-------|------|--------|-------|---------|--------|---------|--------|
|       |     | Sim.  | Obs.  |      |        |       |         |        |         |        |
| 59264 | 637 | 74.40 | 84.11 | 0.77 | -9.71  | 11.13 | -7.58%  | 9.10%  | -11.54% | 13.23% |
| 59270 | 636 | 70.22 | 83.54 | 0.73 | -13.32 | 14.34 | -10.55% | 11.72% | -15.95% | 17.16% |
| 59271 | 635 | 68.78 | 82.10 | 0.69 | -13.28 | 14.28 | -10.90% | 12.10% | -16.17% | 17.39% |
| 59276 | 635 | 66.81 | 85.46 | 0.74 | -18.64 | 18.97 | -15.37% | 15.71% | -21.82% | 22.20% |
| 59278 | 640 | 70.23 | 84.31 | 0.76 | -14.08 | 14.79 | -11.44% | 12.13% | -16.70% | 17.54% |
| 59279 | 637 | 60.59 | 80.87 | 0.76 | -20.28 | 20.32 | -18.00% | 18.06% | -25.08% | 25.12% |
| 59284 | 640 | 61.25 | 74.59 | 0.85 | -13.34 | 13.68 | -12.37% | 12.88% | -17.89% | 18.34% |
| 59285 | 634 | 70.15 | 81.27 | 0.72 | -11.12 | 12.77 | -8.37%  | 10.66% | -13.68% | 15.71% |
| 59287 | 636 | 70.62 | 79.60 | 0.76 | -8.06  | 10.31 | -6.10%  | 8.91%  | -10.12% | 12.95% |
| 59288 | 636 | 58.05 | 75.59 | 0.73 | -17.52 | 17.54 | -16.90% | 16.93% | -23.18% | 23.21% |
| 59289 | 638 | 59.34 | 76.56 | 0.89 | -17.26 | 17.26 | -16.73% | 16.73% | -22.54% | 22.54% |
| 59290 | 639 | 68.30 | 81.06 | 0.76 | -12.76 | 13.21 | -10.59% | 11.19% | -15.74% | 16.29% |
| 59294 | 636 | 63.06 | 78.14 | 0.74 | -15.08 | 15.26 | -13.69% | 13.89% | -19.30% | 19.53% |
| 59297 | 638 | 68.10 | 77.30 | 0.87 | -9.20  | 10.13 | -8.24%  | 9.21%  | -11.90% | 13.10% |
| 59298 | 639 | 63.81 | 73.45 | 0.90 | -9.63  | 10.35 | -9.62%  | 10.28% | -13.12% | 14.09% |
| 59473 | 637 | 67.63 | 79.09 | 0.85 | -11.46 | 12.18 | -10.42% | 11.05% | -14.49% | 15.40% |
| 59475 | 637 | 64.24 | 80.11 | 0.83 | -15.87 | 15.96 | -14.39% | 14.48% | -19.81% | 19.92% |
| 59476 | 641 | 62.88 | 73.91 | 0.88 | -11.03 | 11.47 | -10.96% | 11.33% | -14.93% | 15.52% |
| 59477 | 637 | 70.63 | 84.88 | 0.77 | -14.25 | 14.52 | -11.63% | 11.89% | -16.79% | 17.10% |
| 59478 | 640 | 68.45 | 79.08 | 0.84 | -10.63 | 11.35 | -9.78%  | 10.36% | -13.44% | 14.36% |
| 59480 | 637 | 58.46 | 72.40 | 0.88 | -13.94 | 13.97 | -13.92% | 13.97% | -19.25% | 19.30% |
| 59481 | 634 | 59.42 | 75.93 | 0.74 | -16.51 | 16.59 | -15.40% | 15.56% | -21.75% | 21.85% |
| 59485 | 637 | 64.38 | 76.87 | 0.82 | -12.49 | 12.99 | -11.94% | 12.40% | -16.24% | 16.90% |
| 59487 | 636 | 65.96 | 80.93 | 0.86 | -14.97 | 15.03 | -13.49% | 13.56% | -18.50% | 18.57% |
| 59488 | 639 | 70.21 | 77.49 | 0.82 | -7.28  | 8.77  | -6.77%  | 8.06%  | -9.40%  | 11.31% |
| 59492 | 645 | 70.88 | 78.73 | 0.87 | -7.85  | 9.07  | -6.91%  | 8.16%  | -9.97%  | 11.52% |
| 59493 | 638 | 62.41 | 76.38 | 0.79 | -13.97 | 14.22 | -13.57% | 13.77% | -18.29% | 18.61% |

Table S10 Meteorological verification metrics for 2-m temperature in January.

| Site  | N   | Ave.  |       | R    | MB   | ME   | MFB   | MFE   | NMB    | NME    |
|-------|-----|-------|-------|------|------|------|-------|-------|--------|--------|
|       |     | Sim.  | Obs.  |      |      |      |       |       |        |        |
| 59264 | 637 | 16.49 | 14.99 | 0.93 | 1.51 | 1.74 | 6.98% | 8.01% | 10.06% | 11.59% |
| 59270 | 636 | 16.46 | 14.90 | 0.94 | 1.57 | 1.76 | 7.67% | 8.51% | 10.51% | 11.82% |
| 59271 | 635 | 16.83 | 14.98 | 0.92 | 1.87 | 2.04 | 8.81% | 9.54% | 12.46% | 13.60% |
| 59276 | 635 | 17.00 | 15.19 | 0.93 | 1.81 | 1.99 | 7.69% | 8.64% | 11.91% | 13.12% |
| 59278 | 640 | 16.77 | 16.21 | 0.93 | 0.56 | 1.29 | 2.03% | 5.46% | 3.45%  | 7.94%  |
| 59279 | 637 | 17.91 | 16.22 | 0.94 | 1.69 | 1.86 | 6.40% | 7.32% | 10.41% | 11.49% |
| 59284 | 640 | 17.59 | 16.49 | 0.94 | 1.10 | 1.48 | 4.17% | 5.94% | 6.65%  | 8.98%  |
| 59285 | 634 | 16.43 | 15.08 | 0.90 | 1.36 | 1.91 | 6.61% | 9.40% | 9.00%  | 12.66% |
| 59287 | 636 | 16.61 | 15.79 | 0.94 | 0.82 | 1.38 | 3.26% | 6.13% | 5.17%  | 8.74%  |
| 59288 | 636 | 18.48 | 16.30 | 0.93 | 2.17 | 2.24 | 8.46% | 8.80% | 13.32% | 13.71% |
| 59289 | 638 | 19.18 | 17.36 | 0.95 | 1.82 | 1.86 | 6.82% | 7.01% | 10.48% | 10.74% |
| 59290 | 639 | 16.23 | 15.21 | 0.92 | 1.02 | 1.68 | 5.10% | 8.49% | 6.70%  | 11.05% |
| 59294 | 636 | 17.80 | 16.41 | 0.92 | 1.39 | 1.73 | 5.58% | 7.20% | 8.45%  | 10.52% |
| 59297 | 638 | 17.51 | 16.78 | 0.94 | 0.73 | 1.32 | 2.62% | 5.49% | 4.37%  | 7.86%  |
| 59298 | 639 | 17.66 | 16.76 | 0.94 | 0.90 | 1.20 | 3.40% | 4.86% | 5.35%  | 7.17%  |
| 59473 | 637 | 17.39 | 16.32 | 0.93 | 1.07 | 1.45 | 4.42% | 6.12% | 6.55%  | 8.88%  |
| 59475 | 637 | 18.63 | 16.91 | 0.95 | 1.71 | 1.76 | 6.94% | 7.17% | 10.13% | 10.43% |
| 59476 | 641 | 18.80 | 17.44 | 0.94 | 1.37 | 1.46 | 5.42% | 5.74% | 7.84%  | 8.35%  |
| 59477 | 637 | 17.52 | 16.52 | 0.95 | 1.00 | 1.34 | 4.29% | 5.76% | 6.07%  | 8.13%  |
| 59478 | 640 | 18.23 | 17.25 | 0.92 | 0.98 | 1.40 | 3.93% | 5.57% | 5.71%  | 8.10%  |
| 59480 | 637 | 19.32 | 17.81 | 0.96 | 1.51 | 1.59 | 5.58% | 5.90% | 8.46%  | 8.91%  |
| 59481 | 634 | 18.92 | 17.42 | 0.90 | 1.50 | 1.75 | 5.78% | 6.74% | 8.62%  | 10.02% |
| 59485 | 637 | 19.01 | 17.29 | 0.94 | 1.72 | 1.76 | 6.96% | 7.09% | 9.92%  | 10.15% |
| 59487 | 636 | 19.32 | 17.73 | 0.94 | 1.58 | 1.61 | 6.13% | 6.23% | 8.93%  | 9.08%  |
| 59488 | 639 | 18.91 | 17.71 | 0.94 | 1.20 | 1.34 | 4.86% | 5.29% | 6.80%  | 7.54%  |
| 59492 | 645 | 17.39 | 16.70 | 0.94 | 0.68 | 1.19 | 2.68% | 4.94% | 4.10%  | 7.12%  |
| 59493 | 638 | 19.33 | 18.02 | 0.94 | 1.31 | 1.38 | 4.83% | 5.11% | 7.26%  | 7.64%  |

Table S11 Meteorological verification metrics for 10-m wind speed in January.

| Site  | N   | Ave. |      | R    | MB    | ME   | MFB    | MFE    | NMB     | NME    |
|-------|-----|------|------|------|-------|------|--------|--------|---------|--------|
|       |     | Sim. | Obs. |      |       |      |        |        |         |        |
| 59264 | 637 | 1.77 | 2.08 | 0.47 | -0.31 | 0.86 | -3.37% | 34.15% | -14.70% | 41.57% |
| 59270 | 636 | 1.53 | 1.55 | 0.30 | -0.02 | 0.87 | 3.42%  | 42.16% | -1.54%  | 56.03% |
| 59271 | 635 | 1.97 | 1.65 | 0.45 | 0.31  | 0.86 | 14.81% | 36.26% | 18.86%  | 51.95% |
| 59276 | 635 | 1.96 | 1.90 | 0.22 | 0.05  | 1.04 | 7.03%  | 39.29% | 2.75%   | 54.52% |
| 59278 | 640 | 1.70 | 1.76 | 0.37 | -0.06 | 0.86 | 0.94%  | 35.86% | -3.44%  | 48.88% |
| 59279 | 637 | 2.78 | 3.03 | 0.69 | -0.25 | 0.97 | 1.85%  | 25.63% | -8.37%  | 32.14% |
| 59284 | 640 | 2.83 | 2.52 | 0.65 | 0.31  | 0.89 | 11.20% | 25.63% | 12.26%  | 35.22% |
| 59285 | 634 | 2.55 | 2.02 | 0.53 | 0.53  | 1.28 | 22.24% | 48.04% | 26.18%  | 63.28% |
| 59287 | 636 | 3.00 | 2.90 | 0.63 | 0.09  | 0.96 | 6.95%  | 24.73% | 3.18%   | 33.10% |
| 59288 | 636 | 2.71 | 2.76 | 0.66 | -0.04 | 0.93 | 8.62%  | 28.16% | -1.53%  | 33.79% |
| 59289 | 638 | 2.41 | 2.55 | 0.33 | -0.14 | 1.06 | 5.11%  | 31.38% | -5.56%  | 41.60% |
| 59290 | 639 | 2.35 | 2.06 | 0.52 | 0.30  | 0.99 | 20.22% | 38.49% | 14.45%  | 48.24% |
| 59294 | 636 | 3.21 | 2.94 | 0.70 | 0.27  | 1.09 | 12.81% | 30.02% | 9.26%   | 36.97% |
| 59297 | 638 | 1.95 | 2.11 | 0.33 | -0.17 | 0.94 | -2.48% | 31.34% | -7.86%  | 44.66% |
| 59298 | 639 | 3.14 | 2.95 | 0.67 | 0.20  | 1.01 | 11.85% | 25.94% | 6.66%   | 34.45% |
| 59473 | 637 | 2.54 | 2.47 | 0.65 | 0.07  | 0.91 | 12.62% | 31.98% | 2.99%   | 36.84% |
| 59475 | 637 | 2.47 | 2.12 | 0.58 | 0.35  | 0.91 | 18.92% | 35.55% | 16.66%  | 42.99% |
| 59476 | 641 | 3.12 | 3.17 | 0.73 | -0.05 | 0.99 | 5.90%  | 26.79% | -1.42%  | 31.39% |
| 59477 | 637 | 2.18 | 1.75 | 0.63 | 0.42  | 0.93 | 20.53% | 41.92% | 24.22%  | 52.86% |
| 59478 | 640 | 3.11 | 2.92 | 0.74 | 0.19  | 0.99 | 16.85% | 34.86% | 6.64%   | 33.93% |
| 59480 | 637 | 2.69 | 2.36 | 0.54 | 0.33  | 0.93 | 15.25% | 30.24% | 14.10%  | 39.41% |
| 59481 | 634 | 2.75 | 1.85 | 0.53 | 0.91  | 1.14 | 35.31% | 41.70% | 48.99%  | 61.58% |
| 59485 | 637 | 2.64 | 1.99 | 0.52 | 0.66  | 0.97 | 28.15% | 35.77% | 32.99%  | 49.03% |
| 59487 | 636 | 2.58 | 2.42 | 0.62 | 0.16  | 0.87 | 11.49% | 27.83% | 6.76%   | 36.07% |
| 59488 | 639 | 3.33 | 2.67 | 0.47 | 0.66  | 1.28 | 27.26% | 39.24% | 24.82%  | 47.96% |
| 59492 | 645 | 2.66 | 2.73 | 0.27 | -0.07 | 1.16 | 5.94%  | 31.32% | -2.59%  | 42.67% |
| 59493 | 638 | 2.82 | 2.29 | 0.37 | 0.53  | 1.14 | 23.44% | 35.82% | 23.24%  | 49.78% |

Table S12 Meteorological verification metrics for 2-m relative humidity in April.

| Site  | N   | Ave.  |       | R    | MB     | ME    | MFB     | MFE    | NMB     | NME    |
|-------|-----|-------|-------|------|--------|-------|---------|--------|---------|--------|
|       |     | Sim.  | Obs.  |      |        |       |         |        |         |        |
| 59264 | 777 | 71.41 | 82.24 | 0.75 | -10.83 | 12.32 | -9.23%  | 10.58% | -13.17% | 14.98% |
| 59270 | 779 | 70.04 | 80.58 | 0.75 | -10.53 | 12.08 | -8.99%  | 10.43% | -13.07% | 15.00% |
| 59271 | 777 | 69.42 | 80.45 | 0.75 | -11.03 | 12.28 | -9.81%  | 10.93% | -13.72% | 15.26% |
| 59276 | 781 | 68.70 | 85.22 | 0.76 | -16.52 | 16.96 | -14.05% | 14.46% | -19.39% | 19.90% |
| 59278 | 779 | 73.37 | 84.85 | 0.75 | -11.48 | 12.83 | -9.75%  | 10.91% | -13.53% | 15.13% |
| 59279 | 780 | 61.16 | 82.93 | 0.78 | -21.77 | 21.82 | -19.44% | 19.49% | -26.25% | 26.32% |
| 59284 | 779 | 58.08 | 77.53 | 0.81 | -19.45 | 19.52 | -18.69% | 18.78% | -25.08% | 25.18% |
| 59285 | 778 | 68.20 | 83.98 | 0.72 | -15.78 | 16.68 | -13.19% | 14.20% | -18.79% | 19.86% |
| 59287 | 781 | 68.72 | 82.14 | 0.75 | -13.45 | 14.65 | -11.28% | 12.82% | -16.38% | 17.84% |
| 59288 | 780 | 58.12 | 75.87 | 0.78 | -17.75 | 17.84 | -17.53% | 17.61% | -23.39% | 23.52% |
| 59289 | 776 | 61.46 | 81.06 | 0.81 | -19.61 | 19.69 | -18.15% | 18.23% | -24.19% | 24.29% |
| 59290 | 779 | 66.78 | 85.40 | 0.78 | -18.61 | 18.83 | -15.89% | 16.13% | -21.79% | 22.06% |
| 59294 | 778 | 60.71 | 81.03 | 0.76 | -20.33 | 20.37 | -18.40% | 18.45% | -25.09% | 25.14% |
| 59297 | 779 | 67.76 | 82.09 | 0.79 | -14.33 | 14.80 | -12.63% | 13.15% | -17.45% | 18.02% |
| 59298 | 779 | 64.46 | 78.90 | 0.80 | -14.45 | 14.88 | -13.51% | 14.00% | -18.31% | 18.86% |
| 59473 | 778 | 71.80 | 82.58 | 0.81 | -10.78 | 11.97 | -9.63%  | 10.58% | -13.05% | 14.49% |
| 59475 | 779 | 67.67 | 83.99 | 0.76 | -16.32 | 16.60 | -14.34% | 14.64% | -19.43% | 19.77% |
| 59476 | 779 | 67.46 | 78.82 | 0.81 | -11.35 | 12.26 | -10.73% | 11.50% | -14.41% | 15.55% |
| 59477 | 778 | 74.11 | 86.42 | 0.73 | -12.30 | 13.36 | -10.26% | 11.20% | -14.24% | 15.46% |
| 59478 | 780 | 73.10 | 83.24 | 0.74 | -10.13 | 11.76 | -8.83%  | 10.24% | -12.17% | 14.13% |
| 59480 | 780 | 60.33 | 77.58 | 0.81 | -17.25 | 17.36 | -16.41% | 16.52% | -22.24% | 22.38% |
| 59481 | 779 | 60.78 | 78.63 | 0.77 | -17.86 | 17.95 | -16.74% | 16.86% | -22.71% | 22.83% |
| 59485 | 778 | 67.68 | 80.30 | 0.76 | -12.62 | 13.40 | -11.42% | 12.13% | -15.72% | 16.69% |
| 59487 | 778 | 71.40 | 85.02 | 0.72 | -13.62 | 14.22 | -11.68% | 12.26% | -16.02% | 16.72% |
| 59488 | 779 | 77.66 | 84.66 | 0.73 | -7.01  | 9.11  | -6.05%  | 7.75%  | -8.28%  | 10.76% |
| 59492 | 778 | 73.16 | 81.49 | 0.78 | -8.33  | 10.23 | -7.06%  | 9.09%  | -10.22% | 12.55% |
| 59493 | 779 | 67.06 | 82.50 | 0.70 | -15.45 | 15.69 | -13.48% | 13.73% | -18.72% | 19.02% |



Table S13 Meteorological verification metrics for 2-m temperature in April.

| Site  | N   | Ave.  |       | R    | MB   | ME   | MFB   | MFE   | NMB    | NME    |
|-------|-----|-------|-------|------|------|------|-------|-------|--------|--------|
|       |     | Sim.  | Obs.  |      |      |      |       |       |        |        |
| 59264 | 777 | 23.43 | 22.01 | 0.89 | 1.42 | 1.91 | 4.37% | 5.87% | 6.44%  | 8.68%  |
| 59270 | 779 | 23.19 | 21.82 | 0.89 | 1.37 | 1.88 | 4.20% | 5.76% | 6.28%  | 8.63%  |
| 59271 | 777 | 23.49 | 21.52 | 0.89 | 1.96 | 2.22 | 6.22% | 6.99% | 9.12%  | 10.32% |
| 59276 | 781 | 23.89 | 21.88 | 0.88 | 2.02 | 2.28 | 6.19% | 6.97% | 9.22%  | 10.44% |
| 59278 | 779 | 23.36 | 22.47 | 0.86 | 0.88 | 1.85 | 2.48% | 5.53% | 3.93%  | 8.23%  |
| 59279 | 780 | 25.01 | 22.86 | 0.89 | 2.14 | 2.24 | 6.22% | 6.48% | 9.37%  | 9.79%  |
| 59284 | 779 | 25.12 | 22.65 | 0.91 | 2.47 | 2.53 | 7.05% | 7.24% | 10.89% | 11.18% |
| 59285 | 778 | 23.41 | 21.42 | 0.90 | 1.99 | 2.25 | 6.37% | 7.20% | 9.27%  | 10.53% |
| 59287 | 781 | 23.45 | 21.70 | 0.90 | 1.75 | 2.09 | 5.45% | 6.43% | 8.09%  | 9.62%  |
| 59288 | 780 | 25.43 | 22.92 | 0.89 | 2.51 | 2.56 | 7.30% | 7.43% | 10.97% | 11.19% |
| 59289 | 776 | 24.89 | 22.68 | 0.90 | 2.21 | 2.32 | 6.51% | 6.82% | 9.73%  | 10.24% |
| 59290 | 779 | 23.16 | 21.31 | 0.92 | 1.85 | 2.02 | 5.83% | 6.36% | 8.68%  | 9.48%  |
| 59294 | 778 | 24.79 | 22.23 | 0.91 | 2.56 | 2.62 | 7.58% | 7.75% | 11.51% | 11.79% |
| 59297 | 779 | 23.88 | 22.22 | 0.92 | 1.66 | 1.84 | 4.82% | 5.38% | 7.48%  | 8.27%  |
| 59298 | 779 | 23.95 | 22.21 | 0.92 | 1.74 | 1.82 | 5.13% | 5.37% | 7.82%  | 8.19%  |
| 59473 | 778 | 23.57 | 22.42 | 0.85 | 1.15 | 1.84 | 3.56% | 5.56% | 5.14%  | 8.22%  |
| 59475 | 779 | 24.58 | 22.78 | 0.87 | 1.80 | 2.06 | 5.53% | 6.24% | 7.90%  | 9.06%  |
| 59476 | 779 | 24.28 | 23.15 | 0.85 | 1.13 | 1.66 | 3.47% | 4.91% | 4.89%  | 7.18%  |
| 59477 | 778 | 23.77 | 22.28 | 0.87 | 1.49 | 1.89 | 4.53% | 5.72% | 6.68%  | 8.48%  |
| 59478 | 780 | 23.81 | 23.02 | 0.83 | 0.79 | 1.71 | 2.45% | 5.06% | 3.43%  | 7.41%  |
| 59480 | 780 | 25.48 | 23.49 | 0.90 | 1.99 | 2.08 | 5.64% | 5.87% | 8.47%  | 8.85%  |
| 59481 | 779 | 25.20 | 23.11 | 0.90 | 2.09 | 2.18 | 6.07% | 6.32% | 9.04%  | 9.44%  |
| 59485 | 778 | 24.37 | 22.91 | 0.90 | 1.46 | 1.72 | 4.45% | 5.16% | 6.35%  | 7.51%  |
| 59487 | 778 | 24.03 | 23.06 | 0.84 | 0.97 | 1.53 | 3.00% | 4.53% | 4.20%  | 6.66%  |
| 59488 | 779 | 22.74 | 22.61 | 0.84 | 0.13 | 1.21 | 0.66% | 3.66% | 0.57%  | 5.36%  |
| 59492 | 778 | 22.83 | 22.07 | 0.91 | 0.77 | 1.41 | 2.48% | 4.39% | 3.48%  | 6.39%  |
| 59493 | 779 | 24.19 | 22.95 | 0.90 | 1.24 | 1.46 | 3.80% | 4.37% | 5.42%  | 6.38%  |

Table S14 Meteorological verification metrics for 10-m wind speed in April.

| Site  | N   | Ave. |      | R    | MB    | ME   | MFB    | MFE    | NMB    | NME    |
|-------|-----|------|------|------|-------|------|--------|--------|--------|--------|
|       |     | Sim. | Obs. |      |       |      |        |        |        |        |
| 59264 | 777 | 2.67 | 2.28 | 0.51 | 0.39  | 1.12 | 18.01% | 37.27% | 17.14% | 49.22% |
| 59270 | 779 | 2.44 | 2.15 | 0.47 | 0.29  | 1.11 | 14.27% | 36.82% | 13.55% | 51.55% |
| 59271 | 777 | 2.57 | 1.80 | 0.44 | 0.77  | 1.20 | 24.71% | 41.14% | 42.51% | 66.53% |
| 59276 | 781 | 2.82 | 2.40 | 0.30 | 0.43  | 1.36 | 13.85% | 38.62% | 17.76% | 56.83% |
| 59278 | 779 | 2.59 | 2.57 | 0.45 | 0.02  | 1.18 | 6.10%  | 32.14% | 0.89%  | 45.70% |
| 59279 | 780 | 3.35 | 2.91 | 0.56 | 0.44  | 1.26 | 16.57% | 32.55% | 15.18% | 43.45% |
| 59284 | 779 | 3.15 | 2.64 | 0.53 | 0.52  | 1.17 | 17.24% | 30.70% | 19.53% | 44.29% |
| 59285 | 778 | 3.00 | 2.01 | 0.51 | 0.99  | 1.42 | 33.46% | 45.94% | 49.30% | 70.74% |
| 59287 | 781 | 3.39 | 2.66 | 0.58 | 0.73  | 1.34 | 23.10% | 35.26% | 27.41% | 50.30% |
| 59288 | 780 | 3.43 | 3.09 | 0.60 | 0.33  | 1.27 | 17.16% | 32.71% | 10.80% | 41.04% |
| 59289 | 776 | 2.97 | 2.95 | 0.52 | 0.03  | 1.20 | 5.51%  | 30.54% | 0.89%  | 40.72% |
| 59290 | 779 | 2.72 | 1.75 | 0.43 | 0.97  | 1.38 | 31.72% | 48.46% | 55.13% | 78.68% |
| 59294 | 778 | 3.09 | 2.30 | 0.60 | 0.79  | 1.31 | 25.14% | 41.06% | 34.32% | 56.84% |
| 59297 | 779 | 2.55 | 2.34 | 0.48 | 0.20  | 1.21 | 6.14%  | 34.85% | 8.71%  | 51.56% |
| 59298 | 779 | 3.03 | 2.83 | 0.64 | 0.20  | 1.11 | 8.35%  | 28.51% | 7.06%  | 39.14% |
| 59473 | 778 | 3.11 | 3.03 | 0.58 | 0.08  | 1.27 | 12.10% | 33.56% | 2.57%  | 41.83% |
| 59475 | 779 | 3.13 | 2.58 | 0.64 | 0.55  | 1.19 | 22.41% | 36.60% | 21.30% | 45.92% |
| 59476 | 779 | 3.32 | 3.12 | 0.67 | 0.19  | 1.20 | 11.09% | 30.85% | 6.22%  | 38.54% |
| 59477 | 778 | 2.64 | 2.14 | 0.54 | 0.49  | 1.34 | 17.10% | 47.31% | 23.07% | 62.35% |
| 59478 | 780 | 3.64 | 2.84 | 0.67 | 0.80  | 1.36 | 22.80% | 37.94% | 28.10% | 47.88% |
| 59480 | 780 | 3.32 | 2.76 | 0.53 | 0.56  | 1.23 | 19.20% | 32.17% | 20.45% | 44.43% |
| 59481 | 779 | 3.33 | 2.15 | 0.53 | 1.18  | 1.46 | 39.41% | 45.26% | 54.96% | 67.85% |
| 59485 | 778 | 3.11 | 2.39 | 0.60 | 0.73  | 1.21 | 28.50% | 37.85% | 30.47% | 50.72% |
| 59487 | 778 | 3.05 | 2.84 | 0.65 | 0.21  | 1.05 | 11.58% | 29.00% | 7.35%  | 36.86% |
| 59488 | 779 | 3.16 | 3.33 | 0.52 | -0.17 | 1.38 | 3.01%  | 33.03% | -5.16% | 41.38% |
| 59492 | 778 | 3.26 | 3.35 | 0.62 | -0.09 | 1.24 | 1.68%  | 28.62% | -2.61% | 36.90% |
| 59493 | 779 | 2.95 | 2.46 | 0.59 | 0.49  | 1.13 | 21.24% | 34.58% | 19.85% | 45.81% |

Table S15 Meteorological verification metrics for 2-m relative humidity in July.

| Site  | N   | Ave.  |       | R    | MB     | ME    | MFB     | MFE    | NMB     | NME    |
|-------|-----|-------|-------|------|--------|-------|---------|--------|---------|--------|
|       |     | Sim.  | Obs.  |      |        |       |         |        |         |        |
| 59264 | 776 | 67.51 | 88.83 | 0.76 | -21.32 | 21.57 | -17.98% | 18.21% | -24.00% | 24.28% |
| 59270 | 778 | 67.65 | 82.62 | 0.75 | -14.97 | 15.80 | -13.35% | 14.10% | -18.12% | 19.13% |
| 59271 | 778 | 64.60 | 83.74 | 0.70 | -19.15 | 19.51 | -16.85% | 17.21% | -22.87% | 23.30% |
| 59276 | 778 | 61.94 | 87.10 | 0.69 | -25.16 | 25.22 | -21.69% | 21.74% | -28.88% | 28.95% |
| 59278 | 776 | 68.50 | 89.69 | 0.75 | -21.19 | 21.22 | -17.77% | 17.79% | -23.63% | 23.66% |
| 59279 | 779 | 54.65 | 88.15 | 0.65 | -33.49 | 33.49 | -29.41% | 29.41% | -38.00% | 38.00% |
| 59284 | 780 | 54.28 | 79.01 | 0.71 | -24.73 | 24.83 | -23.87% | 23.95% | -31.30% | 31.42% |
| 59285 | 778 | 64.24 | 86.48 | 0.63 | -22.22 | 22.61 | -19.07% | 19.39% | -25.70% | 26.14% |
| 59287 | 787 | 63.67 | 85.22 | 0.64 | -21.55 | 21.80 | -18.62% | 18.84% | -25.29% | 25.58% |
| 59288 | 784 | 53.15 | 79.31 | 0.66 | -26.16 | 26.26 | -25.27% | 25.35% | -32.98% | 33.11% |
| 59289 | 776 | 55.67 | 86.15 | 0.68 | -30.48 | 30.53 | -27.21% | 27.26% | -35.38% | 35.43% |
| 59290 | 779 | 65.62 | 86.15 | 0.73 | -20.53 | 20.99 | -17.76% | 18.16% | -23.83% | 24.36% |
| 59294 | 775 | 56.39 | 84.90 | 0.66 | -28.51 | 28.51 | -25.65% | 25.65% | -33.58% | 33.58% |
| 59297 | 780 | 64.07 | 85.17 | 0.73 | -21.09 | 21.29 | -18.49% | 18.68% | -24.76% | 25.00% |
| 59298 | 781 | 60.78 | 82.76 | 0.77 | -21.97 | 22.01 | -20.14% | 20.17% | -26.54% | 26.59% |
| 59473 | 775 | 66.34 | 83.83 | 0.75 | -17.49 | 17.86 | -15.59% | 15.89% | -20.86% | 21.31% |
| 59475 | 774 | 62.95 | 84.08 | 0.65 | -21.14 | 21.42 | -18.90% | 19.15% | -25.14% | 25.48% |
| 59476 | 782 | 62.40 | 82.03 | 0.73 | -19.63 | 19.95 | -17.98% | 18.27% | -23.93% | 24.32% |
| 59477 | 777 | 71.16 | 90.45 | 0.66 | -19.29 | 19.57 | -15.99% | 16.22% | -21.32% | 21.64% |
| 59478 | 777 | 70.23 | 86.37 | 0.74 | -16.13 | 16.59 | -13.94% | 14.29% | -18.68% | 19.21% |
| 59480 | 778 | 54.17 | 81.23 | 0.77 | -27.06 | 27.06 | -25.47% | 25.47% | -33.31% | 33.31% |
| 59481 | 779 | 54.29 | 79.11 | 0.72 | -24.82 | 24.87 | -23.89% | 23.92% | -31.37% | 31.43% |
| 59485 | 778 | 62.55 | 83.74 | 0.74 | -21.19 | 21.30 | -19.03% | 19.12% | -25.30% | 25.43% |
| 59487 | 777 | 67.36 | 82.22 | 0.74 | -14.86 | 15.82 | -13.76% | 14.48% | -18.07% | 19.25% |
| 59488 | 779 | 76.13 | 83.54 | 0.76 | -7.41  | 11.30 | -7.03%  | 9.93%  | -8.87%  | 13.53% |
| 59492 | 773 | 69.50 | 86.06 | 0.73 | -16.56 | 17.04 | -13.99% | 14.43% | -19.24% | 19.80% |
| 59493 | 775 | 63.42 | 83.01 | 0.77 | -19.59 | 19.90 | -17.69% | 17.97% | -23.60% | 23.98% |

Table S16 Meteorological verification metrics for 2-m temperature in July.

| Site  | N   | Ave.  |       | R    | MB    | ME   | MFB    | MFE   | NMB    | NME    |
|-------|-----|-------|-------|------|-------|------|--------|-------|--------|--------|
|       |     | Sim.  | Obs.  |      |       |      |        |       |        |        |
| 59264 | 776 | 29.68 | 27.57 | 0.87 | 2.11  | 2.21 | 5.01%  | 5.23% | 7.65%  | 8.01%  |
| 59270 | 778 | 29.62 | 28.00 | 0.85 | 1.62  | 1.83 | 3.78%  | 4.27% | 5.78%  | 6.54%  |
| 59271 | 778 | 30.04 | 27.78 | 0.84 | 2.26  | 2.35 | 5.36%  | 5.56% | 8.14%  | 8.46%  |
| 59276 | 778 | 30.61 | 27.96 | 0.80 | 2.65  | 2.70 | 6.16%  | 6.28% | 9.49%  | 9.67%  |
| 59278 | 776 | 29.50 | 27.99 | 0.82 | 1.51  | 1.84 | 3.47%  | 4.28% | 5.41%  | 6.58%  |
| 59279 | 779 | 31.69 | 28.79 | 0.77 | 2.90  | 2.96 | 6.54%  | 6.68% | 10.06% | 10.27% |
| 59284 | 780 | 31.64 | 29.09 | 0.83 | 2.55  | 2.66 | 5.73%  | 5.98% | 8.75%  | 9.13%  |
| 59285 | 778 | 29.76 | 27.67 | 0.83 | 2.08  | 2.31 | 4.99%  | 5.52% | 7.53%  | 8.35%  |
| 59287 | 787 | 29.68 | 27.85 | 0.80 | 1.83  | 2.13 | 4.30%  | 5.03% | 6.57%  | 7.65%  |
| 59288 | 784 | 31.91 | 29.09 | 0.80 | 2.82  | 2.87 | 6.29%  | 6.41% | 9.69%  | 9.88%  |
| 59289 | 776 | 30.97 | 28.31 | 0.79 | 2.65  | 2.73 | 6.11%  | 6.29% | 9.37%  | 9.66%  |
| 59290 | 779 | 29.32 | 27.92 | 0.87 | 1.40  | 1.69 | 3.29%  | 4.00% | 5.00%  | 6.05%  |
| 59294 | 775 | 30.98 | 28.23 | 0.82 | 2.75  | 2.79 | 6.35%  | 6.45% | 9.74%  | 9.89%  |
| 59297 | 780 | 29.71 | 28.39 | 0.88 | 1.34  | 1.56 | 3.05%  | 3.58% | 4.70%  | 5.50%  |
| 59298 | 781 | 29.77 | 28.24 | 0.87 | 1.53  | 1.66 | 3.53%  | 3.82% | 5.43%  | 5.88%  |
| 59473 | 775 | 29.41 | 28.30 | 0.85 | 1.11  | 1.51 | 2.54%  | 3.50% | 3.93%  | 5.34%  |
| 59475 | 774 | 30.06 | 28.17 | 0.76 | 1.89  | 2.21 | 4.35%  | 5.12% | 6.71%  | 7.85%  |
| 59476 | 782 | 29.89 | 28.83 | 0.81 | 1.06  | 1.56 | 2.40%  | 3.59% | 3.68%  | 5.41%  |
| 59477 | 777 | 28.97 | 27.30 | 0.79 | 1.67  | 1.95 | 3.95%  | 4.64% | 6.12%  | 7.16%  |
| 59478 | 777 | 28.88 | 28.41 | 0.80 | 0.47  | 1.44 | 1.04%  | 3.37% | 1.67%  | 5.06%  |
| 59480 | 778 | 31.56 | 29.45 | 0.84 | 2.11  | 2.19 | 4.73%  | 4.90% | 7.18%  | 7.44%  |
| 59481 | 779 | 31.45 | 29.08 | 0.84 | 2.36  | 2.44 | 5.32%  | 5.50% | 8.13%  | 8.40%  |
| 59485 | 778 | 29.77 | 28.56 | 0.83 | 1.21  | 1.53 | 2.77%  | 3.53% | 4.24%  | 5.36%  |
| 59487 | 777 | 28.83 | 28.79 | 0.77 | 0.03  | 1.52 | -0.03% | 3.56% | 0.12%  | 5.27%  |
| 59488 | 779 | 26.67 | 28.61 | 0.81 | -1.94 | 2.25 | -4.79% | 5.48% | -6.78% | 7.86%  |
| 59492 | 773 | 28.35 | 28.08 | 0.85 | 0.27  | 1.13 | 0.64%  | 2.69% | 0.96%  | 4.03%  |
| 59493 | 775 | 29.35 | 28.73 | 0.78 | 0.62  | 1.34 | 1.42%  | 3.08% | 2.16%  | 4.66%  |

Table S17 Meteorological verification metrics for 10-m wind speed in July.

| Site  | N    | Ave. |      | R    | MB    | ME   | MFB     | MFE    | NMB     | NME    |
|-------|------|------|------|------|-------|------|---------|--------|---------|--------|
|       |      | Sim. | Obs. |      |       |      |         |        |         |        |
| 59264 | 1505 | 2.39 | 1.92 | 0.44 | 0.46  | 1.17 | 19.92%  | 41.06% | 24.13%  | 61.09% |
| 59270 | 1513 | 2.36 | 2.12 | 0.51 | 0.24  | 1.13 | 6.79%   | 35.00% | 11.28%  | 53.33% |
| 59271 | 1507 | 2.43 | 1.95 | 0.48 | 0.48  | 1.24 | 21.01%  | 46.10% | 24.57%  | 63.52% |
| 59276 | 1509 | 2.86 | 2.67 | 0.40 | 0.19  | 1.46 | 7.80%   | 37.89% | 7.27%   | 54.75% |
| 59278 | 1506 | 2.54 | 2.65 | 0.51 | -0.11 | 1.32 | 4.34%   | 37.46% | -4.01%  | 49.84% |
| 59279 | 1512 | 3.29 | 2.80 | 0.53 | 0.48  | 1.34 | 19.30%  | 35.51% | 17.20%  | 47.68% |
| 59284 | 1509 | 3.20 | 2.70 | 0.52 | 0.50  | 1.28 | 20.19%  | 35.20% | 18.62%  | 47.58% |
| 59285 | 1508 | 2.97 | 1.89 | 0.53 | 1.08  | 1.46 | 37.98%  | 48.58% | 57.37%  | 77.40% |
| 59287 | 1526 | 3.33 | 2.66 | 0.54 | 0.68  | 1.39 | 21.53%  | 36.68% | 25.51%  | 52.36% |
| 59288 | 1522 | 3.45 | 2.99 | 0.57 | 0.46  | 1.31 | 19.71%  | 34.04% | 15.27%  | 43.93% |
| 59289 | 1508 | 3.27 | 2.92 | 0.57 | 0.35  | 1.24 | 16.22%  | 31.93% | 12.06%  | 42.53% |
| 59290 | 1510 | 2.49 | 1.74 | 0.50 | 0.75  | 1.26 | 26.89%  | 45.99% | 42.86%  | 72.36% |
| 59294 | 1509 | 2.91 | 2.20 | 0.44 | 0.71  | 1.35 | 22.39%  | 39.67% | 32.37%  | 61.18% |
| 59297 | 1505 | 2.77 | 2.39 | 0.57 | 0.39  | 1.17 | 12.49%  | 33.20% | 16.17%  | 48.84% |
| 59298 | 1512 | 3.06 | 2.70 | 0.57 | 0.36  | 1.19 | 15.76%  | 31.51% | 13.39%  | 43.96% |
| 59473 | 1504 | 2.97 | 2.66 | 0.61 | 0.31  | 1.19 | 15.44%  | 33.16% | 11.59%  | 44.76% |
| 59475 | 1504 | 3.12 | 2.63 | 0.52 | 0.49  | 1.40 | 22.31%  | 39.72% | 18.51%  | 53.32% |
| 59476 | 1519 | 3.10 | 3.12 | 0.58 | -0.03 | 1.32 | 7.05%   | 30.53% | -0.93%  | 42.10% |
| 59477 | 1510 | 2.49 | 2.19 | 0.41 | 0.31  | 1.45 | 9.33%   | 46.06% | 14.00%  | 66.37% |
| 59478 | 1512 | 3.35 | 2.46 | 0.53 | 0.88  | 1.51 | 25.85%  | 41.15% | 35.85%  | 61.10% |
| 59480 | 1512 | 3.42 | 3.02 | 0.58 | 0.39  | 1.15 | 13.05%  | 27.17% | 13.02%  | 38.19% |
| 59481 | 1512 | 3.47 | 2.21 | 0.53 | 1.26  | 1.59 | 41.34%  | 47.70% | 56.90%  | 72.06% |
| 59485 | 1515 | 3.22 | 2.63 | 0.61 | 0.60  | 1.24 | 24.60%  | 34.96% | 22.72%  | 47.22% |
| 59487 | 1504 | 2.87 | 2.81 | 0.63 | 0.06  | 1.10 | 9.97%   | 30.47% | 2.19%   | 39.06% |
| 59488 | 1511 | 2.74 | 3.60 | 0.64 | -0.85 | 1.50 | -12.20% | 30.95% | -23.75% | 41.77% |
| 59492 | 1501 | 3.36 | 3.38 | 0.56 | -0.02 | 1.39 | 5.24%   | 30.65% | -0.56%  | 41.24% |
| 59493 | 1504 | 3.05 | 2.58 | 0.52 | 0.47  | 1.43 | 25.10%  | 43.60% | 18.33%  | 55.40% |

Table S18 Meteorological verification metrics for 2-m relative humidity in October.

| Site  | N   | Ave.  |       | R    | MB     | ME    | MFB     | MFE    | NMB     | NME    |
|-------|-----|-------|-------|------|--------|-------|---------|--------|---------|--------|
|       |     | Sim.  | Obs.  |      |        |       |         |        |         |        |
| 59264 | 750 | 65.61 | 79.11 | 0.71 | -13.50 | 15.03 | -11.51% | 13.00% | -17.07% | 19.00% |
| 59270 | 751 | 63.88 | 68.84 | 0.71 | -4.95  | 10.41 | -4.15%  | 10.10% | -7.20%  | 15.12% |
| 59271 | 751 | 61.72 | 76.34 | 0.69 | -14.63 | 15.29 | -13.22% | 13.92% | -19.16% | 20.03% |
| 59276 | 752 | 63.58 | 78.29 | 0.76 | -14.71 | 15.36 | -12.96% | 13.60% | -18.79% | 19.62% |
| 59278 | 754 | 66.99 | 78.63 | 0.69 | -11.64 | 14.11 | -9.77%  | 12.47% | -14.80% | 17.95% |
| 59279 | 757 | 55.50 | 69.42 | 0.72 | -13.92 | 14.50 | -13.98% | 14.69% | -20.05% | 20.88% |
| 59284 | 753 | 55.94 | 66.00 | 0.74 | -10.06 | 10.94 | -10.21% | 11.40% | -15.24% | 16.57% |
| 59285 | 754 | 67.23 | 76.85 | 0.55 | -9.62  | 14.08 | -7.28%  | 12.09% | -12.52% | 18.32% |
| 59287 | 759 | 65.47 | 74.10 | 0.67 | -8.63  | 11.45 | -6.96%  | 10.20% | -11.65% | 15.45% |
| 59288 | 752 | 51.69 | 68.37 | 0.71 | -16.68 | 16.85 | -17.43% | 17.68% | -24.40% | 24.64% |
| 59289 | 752 | 52.08 | 69.57 | 0.76 | -17.49 | 17.54 | -18.27% | 18.32% | -25.13% | 25.21% |
| 59290 | 754 | 64.35 | 77.18 | 0.64 | -12.83 | 14.24 | -10.77% | 12.39% | -16.62% | 18.45% |
| 59294 | 752 | 56.63 | 74.36 | 0.62 | -17.73 | 17.90 | -16.85% | 17.02% | -23.84% | 24.07% |
| 59297 | 753 | 66.65 | 75.34 | 0.71 | -8.69  | 11.10 | -7.58%  | 9.99%  | -11.54% | 14.73% |
| 59298 | 754 | 57.79 | 69.55 | 0.77 | -11.76 | 12.10 | -11.95% | 12.32% | -16.91% | 17.40% |
| 59473 | 752 | 63.59 | 71.94 | 0.77 | -8.35  | 10.55 | -7.74%  | 10.23% | -11.60% | 14.66% |
| 59475 | 753 | 59.15 | 72.86 | 0.75 | -13.70 | 14.35 | -13.07% | 13.82% | -18.81% | 19.70% |
| 59476 | 756 | 55.11 | 66.88 | 0.79 | -11.77 | 12.49 | -12.53% | 13.35% | -17.59% | 18.68% |
| 59477 | 754 | 71.28 | 81.47 | 0.66 | -10.19 | 12.76 | -7.95%  | 10.69% | -12.51% | 15.66% |
| 59478 | 751 | 64.91 | 74.06 | 0.84 | -9.15  | 10.40 | -8.80%  | 9.92%  | -12.36% | 14.04% |
| 59480 | 754 | 51.16 | 64.23 | 0.79 | -13.07 | 13.42 | -14.31% | 14.73% | -20.34% | 20.89% |
| 59481 | 751 | 52.36 | 66.49 | 0.69 | -14.13 | 14.49 | -14.65% | 15.12% | -21.26% | 21.80% |
| 59485 | 755 | 55.42 | 72.48 | 0.79 | -17.05 | 17.23 | -17.42% | 17.57% | -23.53% | 23.78% |
| 59487 | 776 | 57.19 | 70.52 | 0.82 | -13.33 | 13.80 | -14.13% | 14.55% | -18.90% | 19.57% |
| 59488 | 761 | 60.84 | 69.61 | 0.80 | -8.77  | 9.58  | -9.36%  | 10.13% | -12.60% | 13.76% |
| 59492 | 754 | 67.90 | 75.72 | 0.78 | -7.82  | 9.87  | -6.67%  | 8.85%  | -10.33% | 13.03% |
| 59493 | 752 | 54.49 | 67.29 | 0.79 | -12.80 | 13.17 | -13.87% | 14.23% | -19.02% | 19.57% |

Table S19 Meteorological verification metrics for 2-m temperature in October.

| Site  | N   | Ave.  |       | R    | MB    | ME   | MFB    | MFE   | NMB    | NME   |
|-------|-----|-------|-------|------|-------|------|--------|-------|--------|-------|
|       |     | Sim.  | Obs.  |      |       |      |        |       |        |       |
| 59264 | 750 | 23.36 | 23.19 | 0.94 | 0.17  | 1.37 | 0.08%  | 4.21% | 0.73%  | 5.93% |
| 59270 | 751 | 23.34 | 23.81 | 0.94 | -0.48 | 1.45 | -1.70% | 4.40% | -2.01% | 6.09% |
| 59271 | 751 | 24.10 | 23.00 | 0.95 | 1.10  | 1.49 | 3.38%  | 4.57% | 4.78%  | 6.50% |
| 59276 | 752 | 24.11 | 23.32 | 0.95 | 0.80  | 1.31 | 2.11%  | 3.70% | 3.41%  | 5.61% |
| 59278 | 754 | 23.94 | 24.16 | 0.92 | -0.22 | 1.41 | -1.09% | 4.20% | -0.91% | 5.86% |
| 59279 | 757 | 25.64 | 24.49 | 0.94 | 1.15  | 1.63 | 2.84%  | 4.37% | 4.69%  | 6.64% |
| 59284 | 753 | 25.41 | 24.84 | 0.93 | 0.57  | 1.37 | 1.37%  | 3.66% | 2.30%  | 5.50% |
| 59285 | 754 | 23.38 | 23.17 | 0.91 | 0.22  | 1.71 | 0.64%  | 5.41% | 0.95%  | 7.39% |
| 59287 | 759 | 23.87 | 23.53 | 0.95 | 0.34  | 1.23 | 0.90%  | 3.67% | 1.44%  | 5.24% |
| 59288 | 752 | 26.38 | 24.84 | 0.94 | 1.55  | 1.78 | 3.94%  | 4.65% | 6.23%  | 7.15% |
| 59289 | 752 | 26.73 | 25.07 | 0.94 | 1.66  | 1.79 | 4.24%  | 4.61% | 6.62%  | 7.14% |
| 59290 | 754 | 23.47 | 23.10 | 0.95 | 0.37  | 1.34 | 1.44%  | 4.21% | 1.62%  | 5.79% |
| 59294 | 752 | 25.46 | 24.22 | 0.95 | 1.23  | 1.54 | 3.47%  | 4.36% | 5.09%  | 6.34% |
| 59297 | 753 | 24.17 | 24.27 | 0.96 | -0.10 | 1.07 | -0.57% | 3.16% | -0.41% | 4.42% |
| 59298 | 754 | 25.21 | 24.50 | 0.95 | 0.71  | 1.06 | 1.94%  | 2.91% | 2.90%  | 4.31% |
| 59473 | 752 | 24.70 | 24.51 | 0.92 | 0.19  | 1.33 | 0.32%  | 3.75% | 0.78%  | 5.41% |
| 59475 | 753 | 25.65 | 24.37 | 0.91 | 1.28  | 1.65 | 3.42%  | 4.57% | 5.24%  | 6.76% |
| 59476 | 756 | 26.41 | 25.42 | 0.91 | 0.99  | 1.34 | 2.54%  | 3.46% | 3.88%  | 5.26% |
| 59477 | 754 | 23.60 | 23.59 | 0.92 | 0.01  | 1.23 | -0.14% | 3.65% | 0.06%  | 5.22% |
| 59478 | 751 | 24.86 | 24.79 | 0.92 | 0.07  | 1.19 | 0.05%  | 3.25% | 0.30%  | 4.79% |
| 59480 | 754 | 27.11 | 26.03 | 0.94 | 1.08  | 1.38 | 2.64%  | 3.47% | 4.14%  | 5.31% |
| 59481 | 751 | 26.69 | 25.51 | 0.91 | 1.18  | 1.61 | 3.08%  | 4.30% | 4.61%  | 6.33% |
| 59485 | 755 | 26.71 | 24.99 | 0.90 | 1.71  | 1.80 | 4.71%  | 4.95% | 6.86%  | 7.22% |
| 59487 | 776 | 26.69 | 25.87 | 0.92 | 0.82  | 1.25 | 2.18%  | 3.25% | 3.16%  | 4.82% |
| 59488 | 761 | 26.62 | 25.84 | 0.90 | 0.78  | 1.21 | 2.17%  | 3.20% | 3.01%  | 4.70% |
| 59492 | 754 | 23.96 | 24.16 | 0.96 | -0.20 | 1.03 | -0.73% | 3.01% | -0.82% | 4.27% |
| 59493 | 752 | 26.73 | 25.60 | 0.93 | 1.13  | 1.41 | 2.88%  | 3.65% | 4.41%  | 5.52% |

Table S20 Meteorological verification metrics for 10-m wind speed in October.

| Site  | N   | Ave. |      | R    | MB    | ME   | MFB     | MFE    | NMB     | NME    |
|-------|-----|------|------|------|-------|------|---------|--------|---------|--------|
|       |     | Sim. | Obs. |      |       |      |         |        |         |        |
| 59264 | 750 | 2.29 | 2.38 | 0.45 | -0.09 | 1.04 | 5.13%   | 31.58% | -3.90%  | 43.61% |
| 59270 | 751 | 1.94 | 2.23 | 0.45 | -0.29 | 1.13 | -5.53%  | 38.52% | -13.12% | 50.59% |
| 59271 | 751 | 2.57 | 2.01 | 0.45 | 0.56  | 1.25 | 36.98%  | 52.99% | 28.10%  | 62.11% |
| 59276 | 752 | 2.21 | 2.71 | 0.33 | -0.51 | 1.35 | -12.07% | 38.10% | -18.70% | 49.71% |
| 59278 | 754 | 2.10 | 2.73 | 0.35 | -0.63 | 1.40 | -6.42%  | 39.86% | -23.24% | 51.26% |
| 59279 | 757 | 3.86 | 3.52 | 0.72 | 0.33  | 1.20 | 14.22%  | 27.01% | 9.44%   | 34.17% |
| 59284 | 753 | 4.05 | 3.11 | 0.68 | 0.93  | 1.35 | 24.93%  | 30.93% | 29.99%  | 43.22% |
| 59285 | 754 | 3.32 | 2.58 | 0.61 | 0.74  | 1.44 | 28.80%  | 43.60% | 28.78%  | 55.92% |
| 59287 | 759 | 4.10 | 3.43 | 0.76 | 0.67  | 1.35 | 21.02%  | 29.59% | 19.50%  | 39.27% |
| 59288 | 752 | 4.04 | 3.64 | 0.68 | 0.40  | 1.37 | 17.09%  | 31.42% | 10.86%  | 37.54% |
| 59289 | 752 | 3.84 | 3.21 | 0.64 | 0.63  | 1.29 | 20.74%  | 31.46% | 19.54%  | 40.28% |
| 59290 | 754 | 3.07 | 2.46 | 0.68 | 0.61  | 1.17 | 23.82%  | 38.03% | 24.67%  | 47.38% |
| 59294 | 752 | 3.99 | 3.28 | 0.65 | 0.71  | 1.44 | 23.55%  | 34.70% | 21.67%  | 43.96% |
| 59297 | 753 | 2.89 | 3.12 | 0.58 | -0.23 | 1.35 | 2.61%   | 31.12% | -7.30%  | 43.25% |
| 59298 | 754 | 4.43 | 3.69 | 0.65 | 0.74  | 1.47 | 18.33%  | 28.95% | 20.03%  | 39.85% |
| 59473 | 752 | 3.10 | 3.74 | 0.72 | -0.64 | 1.45 | -0.83%  | 31.15% | -17.04% | 38.83% |
| 59475 | 753 | 3.26 | 3.19 | 0.72 | 0.07  | 1.28 | 12.85%  | 32.44% | 2.15%   | 39.99% |
| 59476 | 756 | 4.23 | 4.40 | 0.77 | -0.17 | 1.42 | 4.16%   | 26.37% | -3.84%  | 32.28% |
| 59477 | 754 | 2.36 | 2.39 | 0.58 | -0.03 | 1.20 | 7.85%   | 39.60% | -1.08%  | 50.16% |
| 59478 | 751 | 3.61 | 3.49 | 0.77 | 0.12  | 1.12 | 13.04%  | 30.97% | 3.51%   | 32.17% |
| 59480 | 754 | 3.96 | 3.27 | 0.68 | 0.69  | 1.26 | 17.96%  | 28.41% | 21.21%  | 38.44% |
| 59481 | 751 | 4.07 | 2.42 | 0.67 | 1.65  | 1.83 | 45.40%  | 49.35% | 68.06%  | 75.51% |
| 59485 | 755 | 3.71 | 2.77 | 0.64 | 0.94  | 1.40 | 30.06%  | 37.83% | 33.74%  | 50.30% |
| 59487 | 776 | 3.61 | 3.01 | 0.66 | 0.60  | 1.25 | 17.49%  | 29.72% | 19.74%  | 41.62% |
| 59488 | 761 | 4.84 | 4.36 | 0.47 | 0.48  | 1.72 | 12.51%  | 28.83% | 11.10%  | 39.48% |
| 59492 | 754 | 3.17 | 3.52 | 0.44 | -0.35 | 1.43 | 2.55%   | 29.62% | -9.91%  | 40.72% |
| 59493 | 752 | 4.11 | 3.25 | 0.59 | 0.86  | 1.51 | 25.77%  | 34.66% | 26.59%  | 46.46% |

Table S21 The overall validation metrics for all stations for O<sub>3</sub> and PM<sub>2.5</sub>.

|                   |        | January |       |      | April |       |      | July  |       |      | October |       |      |
|-------------------|--------|---------|-------|------|-------|-------|------|-------|-------|------|---------|-------|------|
|                   |        | NMB     | NME   | R    | NMB   | NME   | R    | NMB   | NME   | R    | NMB     | NME   | R    |
|                   |        | (%)     | (%)   |      | (%)   | (%)   |      | (%)   | (%)   |      | (%)     | (%)   |      |
| O <sub>3</sub>    | BASE   | -4.24   | 17.08 | 0.69 | -1.32 | 17.28 | 0.76 | -4.16 | 15.36 | 0.89 | -3.44   | 13.72 | 0.78 |
|                   | EXPR   | -4.04   | 17.12 | 0.69 | -0.6  | 16.92 | 0.76 | -4.04 | 14.96 | 0.89 | -3.12   | 13.44 | 0.78 |
|                   | EXPR-V | -3.24   | 16.64 | 0.70 | -0.12 | 16.48 | 0.77 | -3.48 | 14.6  | 0.89 | -2.4    | 13    | 0.79 |
|                   |        | NMB     | NME   | R    | NMB   | NME   | R    | NMB   | NME   | R    | NMB     | NME   | R    |
|                   |        | (%)     | (%)   |      | (%)   | (%)   |      | (%)   | (%)   |      | (%)     | (%)   |      |
| PM <sub>2.5</sub> | BASE   | -11.0   | 23.3  | 0.59 | -40.3 | 40.3  | 0.77 | -30.0 | 30.0  | 0.95 | -31.7   | 32.0  | 0.93 |
|                   | EXPR   | -7.7    | 21.8  | 0.62 | -35.1 | 35.1  | 0.78 | -22.0 | 22.0  | 0.95 | -27.5   | 29.1  | 0.93 |
|                   | EXPR-V | -2.5    | 21.3  | 0.62 | -26.8 | 27.4  | 0.78 | -9.5  | 13.2  | 0.95 | -20.0   | 24.3  | 0.93 |



## 2. Equation

$$MB = \frac{1}{n} \sum_{i=1}^n (M_i - O_i) \quad (\text{Eq. S1})$$

$$ME = \frac{1}{n} \sum_{i=1}^n |M_i - O_i| \quad \text{Eq. S2)}$$

$$RMSE = \sqrt{\frac{\sum_{i=1}^n (O_i - M_i)^2}{n}} \quad (\text{Eq. S3})$$

$$MFE = \frac{2}{n} \sum_{i=1}^n \left| \frac{M_i - O_i}{M_i + O_i} \right| \quad (\text{Eq. S4})$$

$$MFB = \frac{2}{n} \sum_{i=1}^n \left( \frac{M_i - O_i}{M_i + O_i} \right) \quad (\text{Eq. S5})$$

Where  $M_i$  and  $O_i$  are the simulated and observed data, respectively.  $\bar{M}_i$  and  $\bar{O}$  are the average of the simulated and observed data, respectively.  $n$  is the number of samples.
